# Supplementary material for: Dendritic Cells Pulsed with Cytokine-Adjuvanted Tumor Membrane Vesicles Inhibit Tumor Growth in HER2-Positive and Triple Negative Breast Cancer Models
Source: MDPI journal article supplement (doi:10.3390/ijms22168377), 2021-08-04
Supplement: s1 [file s1]

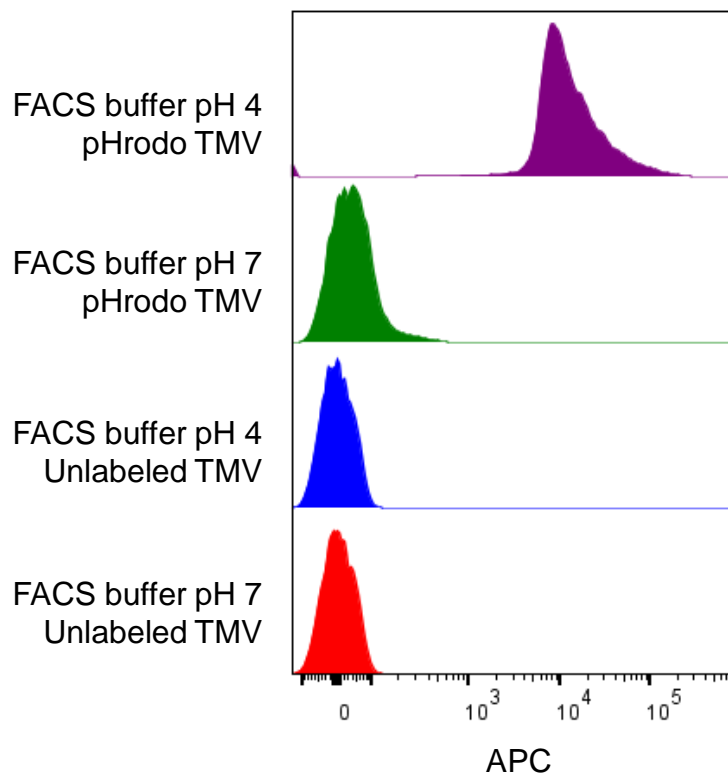

**Supplementary Figure S1. TMVs labeled with pHrodo only fluoresce in low pH environment.**

D2F2/E2 TMVs were labeled as described in methods. Unlabeled and pHrodo labeled TMVs were placed in FACS buffer at pH 7 or in FACS buffer at pH 4 with HCl. The pHrodo Deep Red fluorescence has an emission peak of 640 nm detected on the APC channel.
